# Supplementary material
Source: publisher site journal article supplement (https://www.dovepress.com/article/202996)
Supplement: Supplementary file 1 [file get_supplementary_file.php]

## **Methods**

### **Search strategy**

We searched PubMed and Medline databases in September 2018 to identify previous articles related to adult/ adolescence reward processing and addiction. We excluded any grey literature.

Our initial search used the following terms: ((adult OR adolescence)) AND (reward, addiction, (hedonic OR incentive OR impulsive), (substance OR drug)).

### **Selection of literature**

We discarded duplicates and non-English papers due to lack of resources to translate. Any articles that were clearly irrelevant were discarded immediately. We also discarded reviews, opinion pieces, conference/ poster abstracts, case reports and commentaries which did not contain original research.

All authors then read the title and abstract of each remaining article to check for relevance to our review. We also searched the references of relevant papers and identified further publications which were not captured within our original search but were still relevant to our discussion. FK then reviewed all identified articles to ensure they were relevant to our review.

Articles that were deemed relevant were those which contained quantitative or qualitative research on addiction or reward in animal models or human volunteers. We excluded papers in which the outcomes discussed were not related to addiction or reward. We did not exclude articles if there was no mention to substance or drug misuse – articles focused on other forms of addiction (e.g. gambling) or reward mechanisms (e.g. sex) still contain relevant findings on this behavior's neurocircuitry.

### **Data extraction**

For each article, we extracted the reference, type of study, whether animal or human models, sample size and the relevant findings.

### **Results**

Supplementary Figure 1 shows the search and exclusion process according to PRISMA guidelines.

The search initially yielded 509 articles, 141 of which were duplicates or non-English. A further 8 were added after searching article references. Examination of abstracts and titles led to the exclusion of 236 articles, leaving 124 full texts to be examined for relevance. Of these, 41 articles (including 2 meta-analyses) met inclusion criteria, with 28 studies on animal models and 16 on humans. This is summarized in Supplementary Table 1.

**Supplementary Figure 1**

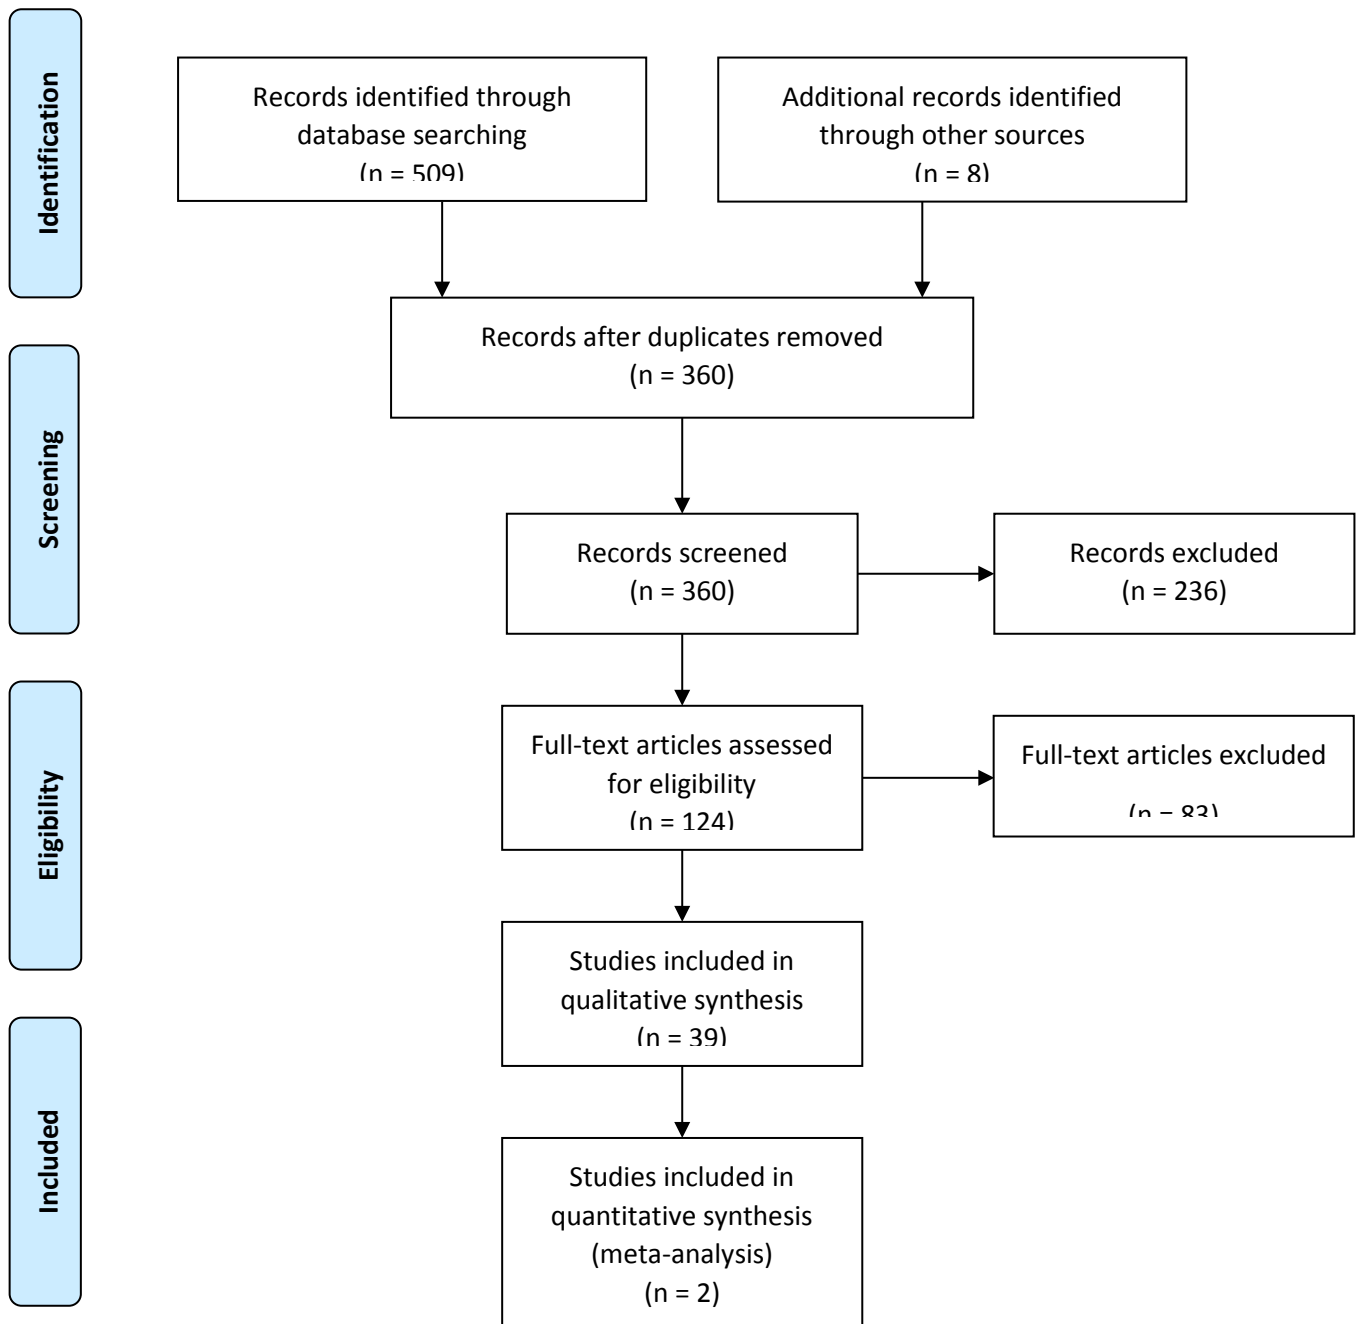

**Supplementary table 1**

| Study                             | Design                    | Model  | Participants                     | Relevant findings                                                                                                                                                                                                                                                                                                     |
|-----------------------------------|---------------------------|--------|----------------------------------|-----------------------------------------------------------------------------------------------------------------------------------------------------------------------------------------------------------------------------------------------------------------------------------------------------------------------|
| Harden (2011) <sup>5</sup>        | Longitudinal cohort study | Human  | 7,640 aged between 12 – 24 years | Impulsivity and sensation seeking showed substantial individual person-to-person differences. The correlation between age-related changes in these behaviors was not significant                                                                                                                                      |
| Urošević (2012) <sup>6</sup>      | Longitudinal cohort study | Human  | 184 aged between 9 to 24 years   | Increased reward sensitivity from early to late adolescence and decline in early twenties (associated with decrease nucleus accumbens volume)                                                                                                                                                                         |
| Ersche (2013) <sup>9</sup>        | Randomized control trial  | Human  | 50 biological sibling pairs      | Increased sensation-seeking traits associated with abnormal orbitofrontal and parahippocampal volume in individuals dependent on stimulant drugs/ used cocaine                                                                                                                                                        |
| Belin (2008) <sup>10</sup>        | Randomized control trial  | Animal | 40 adult rats                    | Evidence that a shift from impulsivity to compulsivity occurs during the development of addictive behavior                                                                                                                                                                                                            |
| Berridge (1998) <sup>21</sup>     | Randomized control trial  | Animal | 38 rats                          | Affective reaction patterns remain normal even after complete depletion of dopamine from striatal/ accumbens dopamine systems                                                                                                                                                                                         |
|                                   | Randomized control trial  | Animal | 8 rats                           | Severe dopamine depletion did not disrupt the acquisition/ expression of a shift from hedonic reactions to aversion                                                                                                                                                                                                   |
|                                   | Randomized control trial  | Animal | 6 rats                           | Diazepam did not alter aversive or hedonic reactions                                                                                                                                                                                                                                                                  |
| Wassum (2011) <sup>22</sup>       | Randomized control trial  | Animal | 29 rats                          | Infusion of mu opioid receptor antagonist into basolateral amygdala (BLA) blocked the normal increase in sucrose-seeking response. Similar treatment with other antagonists were without effect. Thus, shifts in endogenous opioid transmission in the BLA mediate changes in incentive value and compulsive behavior |
|                                   | Randomized control trial  | Animal | 35 rats                          |                                                                                                                                                                                                                                                                                                                       |
|                                   | Randomized control trial  | Animal | 32 rats                          |                                                                                                                                                                                                                                                                                                                       |
|                                   | Randomized control trial  | Animal | 23 rats                          |                                                                                                                                                                                                                                                                                                                       |
| Hernandez (2007) <sup>24</sup>    | Randomized control trial  | Animal | 6 male rats                      | Tonic DA signaling is insensitive to the predictability of rewards                                                                                                                                                                                                                                                    |
| Di Chiara (1988) <sup>25</sup>    | Randomized control trial  | Animal | Unspecified                      | Drugs that are rewarding in animals and humans preferentially increase synaptic dopamine concentrations in the mesolimbic system                                                                                                                                                                                      |
| Pfaus (1999) <sup>26</sup>        | Randomized control trial  | Animal | 6 male, 6 female rats            | Dopamine increased in the accumbens when males were placed in a novel mating chamber and increased in the striatum during copulation                                                                                                                                                                                  |
| Hoebel (1983) <sup>27</sup>       | Randomized control trial  | Animal | 20 rats                          | Amphetamine in the nucleus accumbens activates a local mechanism for response reinforcement                                                                                                                                                                                                                           |
| Yokel & Wise (1976) <sup>28</sup> | Randomized control trial  | Animal | 53 male rats                     | Dopamine receptor blockade interfered with the reinforcing effects of amphetamine                                                                                                                                                                                                                                     |

|                                      |                          |        |                                |                                                                                                                                                                                                           |
|--------------------------------------|--------------------------|--------|--------------------------------|-----------------------------------------------------------------------------------------------------------------------------------------------------------------------------------------------------------|
| Ettenberg (1982) <sup>29</sup>       | Randomized control trial | Animal | 25 male rats                   | Pretreatment with either naltrexone or flupenthixol increased heroine and cocaine self-administration, suggesting independent neural substrates are responsible for the reinforcing actions of both drugs |
| Pecina (1997) <sup>31</sup>          | Randomized control trial | Animal | 8 male rats                    | Pimozide produces a sensorimotor impairment of taste reactivity patterns but does not shift taste palatability toward anhedonia or aversion.                                                              |
| Doyle (1993) <sup>32</sup>           | Randomized control trial | Animal | 12 rats                        | Morphine enhances feeding by increasing the hedonic palatability of food (no change to aversion)                                                                                                          |
| Liggins (2012) <sup>33</sup>         | Randomized control trial | Human  | 49 aged 21.9±3.7 years         | The results suggest that dopamine neurotransmission does not directly influence positive mood in humans                                                                                                   |
| Difeliceantonio (2012) <sup>33</sup> | Randomized control trial | Animal | 81 female rats                 | Opioid/ dopamine injection into neostriatum amplified incentive towards previously learned Pavlovian cue                                                                                                  |
| Wassum (2009) <sup>38</sup>          | Randomized control trial | Animal | Rats (unspecified)             | Changes in palatability and in the incentive value assigned to rewarding events seem to be mediated by distinct neural processes.                                                                         |
| Castro (2014) <sup>39</sup>          | Randomized control trial | Animal | 84 male rats                   | A rostradorsal hotspot in the nucleus accumbens generates opioid-induced hedonic behavior and a separate coldspot mediates hedonic suppression                                                            |
| Ziauddeen (2013) <sup>41</sup>       | Multi center group study | Human  | 63 aged between 18-60 years    | Treatment with a mu-opioid receptor antagonist caused reduction in hedonic responses to dairy products and reduced caloric intake                                                                         |
| Giuliano (2013) <sup>43</sup>        | Randomized control trial | Animal | 74 adult rats                  | μ-opioid receptor antagonist treatment caused a decrease in cocaine seeking and may be a target for addiction treatment                                                                                   |
| Brauer (1996) <sup>46</sup>          | Randomized control trial | Human  | 15 between 21 and 35 years     | A dopamine antagonist did not affect responses to amphetamine, suggesting they do not interact at the receptor level                                                                                      |
| Colasanti (2012) <sup>47</sup>       | Randomized control trial | Human  | 12 aged 36.5±11.9 years        | Amphetamine administration induces endogenous opioid release in different areas of human brain e.g basal ganglia, frontal cortex areas, and thalamus                                                      |
| Giuliano (2012) <sup>48</sup>        | Randomized control trial | Animal | 12 Rats                        | Addition of a μ-opioid receptor antagonist reduced the impact of high hedonic value on binge eating                                                                                                       |
| Cambridge (2013) <sup>50</sup>       | Randomized control trial | Human  | 63 aged 18 to 60 years         | Addition of a μ-opioid receptor antagonist significantly reduced pallidum/putamen responses to pictures of high-calorie food and a reduction in motivation to view images of high-calorie food            |
| Burton (2013) <sup>51</sup>          | Randomized control trial | Animal | 10 juvenile and adult rats     | Amphetamine injections reduced response to a conditioned stimulus (no difference with age)                                                                                                                |
|                                      |                          |        |                                | Injections of D1 and D2 dopamine receptor antagonists diminished incentive motivation in adolescent rats more than in juveniles                                                                           |
| Silverman (2016) <sup>52</sup>       | Meta-analysis            | Human  | 830 participants in 26 studies | fMRI results reveal regions involved in adolescent reward processing are similar to that found in adults – ventral and dorsal striatum, insula, and posterior cingulate cortex. Unlike adolescents,       |

|                               |                          |        |                                       |                                                                                                                                                                                                                                                                                                                                                                                                                           |
|-------------------------------|--------------------------|--------|---------------------------------------|---------------------------------------------------------------------------------------------------------------------------------------------------------------------------------------------------------------------------------------------------------------------------------------------------------------------------------------------------------------------------------------------------------------------------|
|                               |                          |        |                                       | adults also activate executive control regions of the frontal and parietal lobes during motivated activity                                                                                                                                                                                                                                                                                                                |
| Alarcón (2017) <sup>54</sup>  | Longitudinal study       | Human  | 167                                   | Increased motivation and salience of reinforcers is linked with more robust striatal blood oxygen level-dependent response, independent of sex hormone levels.                                                                                                                                                                                                                                                            |
| Cohen (2010) <sup>55</sup>    | Randomized control trial | Human  | 67 aged between 8 and 30 years        | Found increased reward-related neural activity during adolescence by demonstrating that this finding is specific to prediction error, reflecting phasic dopamine signaling                                                                                                                                                                                                                                                |
| Bjork (2010) <sup>56</sup>    | Randomized control trial | Human  | 48, 24 aged 12 – 17, 24 aged 22 – 42  | Maturation differences in incentive-motivational neurocircuitry: 1) may be sensitive to nuances of incentive tasks or stimuli, such as behavioral or learning contingencies, and 2) may be specific to the component of the instrumental behavior                                                                                                                                                                         |
| Geier (2010) <sup>57</sup>    | Randomized control trial | Human  | 34, 18 aged 13 – 17, 16 aged 18 – 30  | Found limitations during adolescence in reward assessment and heightened reactivity in anticipation of reward compared with adults. heightened activity in the frontal cortex along the precentral sulcus was also observed in adolescents during reward-trial response preparation, suggesting reward modulation of oculomotor control regions supporting correct inhibitory responding.                                 |
| Luijten (2017) <sup>58</sup>  | Meta-analysis            | Human  | 643 individuals across 25 studies     | During reward anticipation, individuals with substance and gambling addictions showed decreased striatal activation compared with healthy control individuals. During reward outcome, individuals with substance addiction showed increased activation in the ventral striatum, whereas individuals with gambling addiction showed decreased activation in the dorsal striatum compared with healthy control individuals. |
| Besson (2013) <sup>66</sup>   | Randomized control trial | Animal | 144 juvenile rats                     | High impulsivity (cocaine) rats exhibited decreased dopamine mRNA in the mesolimbic pathway and 5-HT mRNA in striatal and prefrontal areas                                                                                                                                                                                                                                                                                |
| Besson (2009) <sup>67</sup>   | Randomized control trial | Animal | 96 rats                               | Dopamine D2/3 receptor antagonist increased the level of impulsivity when infused into the nucleus accumbens core but decreased impulsivity when injected into accumbens shell                                                                                                                                                                                                                                            |
| Olmstead (2009) <sup>68</sup> | Randomized control trial | Animal | 96 $\mu$ and $\delta$ opioidR KO mice | Results suggest that mu-opioid receptors enhance, whereas delta-opioid receptors inhibit, motor impulsivity                                                                                                                                                                                                                                                                                                               |
| Boileau (2006) <sup>71</sup>  | Longitudinal study       | Human  | 10 aged 25.8 $\pm$ 1.8 years          | Sensitization to amphetamine can be achieved in healthy men in the laboratory. This phenomenon is associated with increased dopamine release and persists for at least one year.                                                                                                                                                                                                                                          |
| Di Ciano (2003) <sup>72</sup> | Randomized control trial | Animal | 39 naive rats                         | Administration of a D3 dopamine receptor antagonist decreased impulse for cocaine,                                                                                                                                                                                                                                                                                                                                        |

|                               |                          |        |                                  |                                                                                                                                                                                                                                                         |
|-------------------------------|--------------------------|--------|----------------------------------|---------------------------------------------------------------------------------------------------------------------------------------------------------------------------------------------------------------------------------------------------------|
|                               |                          |        |                                  | suggesting a selective role of these receptors in motivational aspect of conditioned stimuli                                                                                                                                                            |
| Belin (2011) <sup>73</sup>    | Randomized control trial | Animal | 40 adult rats                    | Addiction is sustained by two vulnerable phenotypes: a 'drug use prone' phenotype which brings an individual to develop drug use and an 'addiction prone' phenotype, which facilitates the shift from sustained to compulsive drug intake and addiction |
| Corbit (2012) <sup>74</sup>   | Randomized control trial | Animal | 19 rats                          | Extended alcohol self-administration produces habit-like responding and that response control shifts from the dorsomedial to the dorsolateral striatum                                                                                                  |
| Zapata (2010) <sup>75</sup>   | Randomized control trial | Animal | Rats                             | With more prolonged drug experience, animals transitioned to habitual cocaine seeking. When the dorsolateral striatum (involved in habit learning) was inactivated, drug-seeking reverted to a goal-directed system                                     |
| Molander (2011) <sup>78</sup> | Randomized control trial | Animal | 48 rats                          | Behavioral impulsivity in rats on a test, which predicts vulnerability for cocaine addiction, is distinct from anxiety, novelty reactivity and novelty-induced stress responses, and thus has relevance for the etiology of drug addiction              |
| Conrod (2010) <sup>80</sup>   | Randomized control trial | Human  | 5302 aged between 13 to 16 years | Brief, personality-targeted interventions can prevent the onset and escalation of substance misuse in high-risk adolescents                                                                                                                             |
